# Supplementary material for: Characterization and Preliminary In Vitro Antioxidant Activity of a New Multidrug Formulation Based on the Co-Encapsulation of Rutin and the α-Acylamino-β-Lactone NAAA Inhibitor URB894 within PLGA Nanoparticles
Source: MDPI journal article supplement (doi:10.3390/antiox12020305), 2023-01-28
Supplement: s1 [file s1]

# Characterization and Preliminary *In Vitro* Antioxidant Activity of a New Multidrug Formulation Based on the Co-Encapsulation of Rutin and the $\alpha$ -Acylamino- $\beta$ -Lactone NAAA Inhibitor URB894 within PLGA Nanoparticles

Agnese Gagliardi<sup>a,§</sup>, Silvia Voci<sup>a,§</sup>, Nicola Ambrosio<sup>a</sup>, Massimo Fresta<sup>a</sup>, Andrea Duranti<sup>b,\*</sup>  
Donato Cosco<sup>a,\*</sup>

<sup>a</sup>Department of Health Sciences, University "Magna Græcia" of Catanzaro, Campus Universitario "S Venuta", 88100, Catanzaro, Italy;

<sup>b</sup>Department of Biomolecular Sciences, University of Urbino Carlo Bo, Piazza del Rinascimento 6, 61029, Urbino, Italy

## Supplementary material

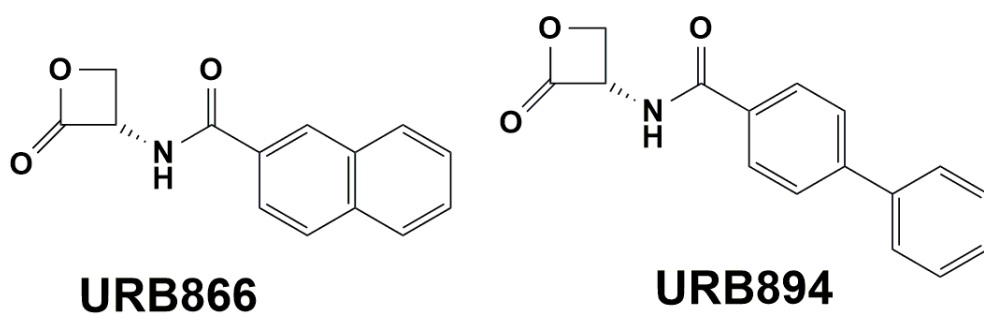

**Fig. S1.** Chemical structures of URB866 and URB894.

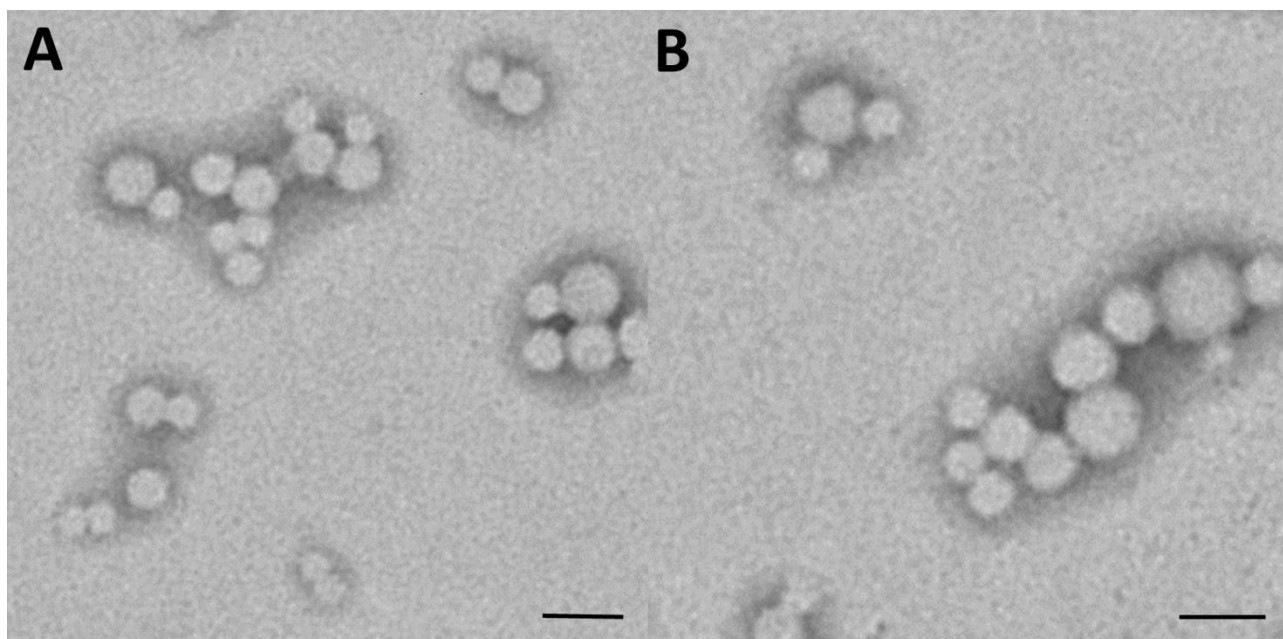

**Fig. S2.** TEM images of (A) empty nanosystems and (B) PLGA-based nanoparticles prepared with 0.4 mg/mL of URB894 and 0.6 mg/mL of rutin. Scale bar = 200 nm.
